# Supplementary material
Source: PubMed Central journal article supplement (PMC2820149)
Supplement: NIHMS172203-supplement-1_si_001.pdf [file NIHMS172203-supplement-1_si_001.pdf]

## Supporting Information

### The Hunt for 8-Oxoguanine Deaminase

Richard S. Hall, Alexander A. Fedorov, Ricardo Marti-Arbona, Elena V. Fedorov, Peter Kolb, J. Michael Sauder, Stephen K. Burley, Brian K. Shoichet, Steven C. Almo, and Frank M. Raushel

*Purification of Pa0142.* Pa0142 was cloned into a pET-30b(+) expression vector from Novagen through the use of *NdeI* and *EcoRI* restriction sites. Gene sequences were verified by the Gene Technologies Lab at Texas A&M University. The expression plasmids were inserted into BL21 (DE3) cells by electroporation. The transformation solution was then transferred into LB growth medium for incubation at 37 °C for 30 minutes, which was followed by plating onto LB agar containing 50 µg/mL kanamycin. Single colonies were selected for growth in liquid LB medium. Typically, prior to induction with 0.1 - 1.0 mM IPTG at an  $A_{600\text{ nm}}$  of ~ 0.6, 50 - 100 µM bipyridyl and 1.0 mM ZnCl<sub>2</sub> were added to supplement the growth medium. The cells grew overnight after which they were collected by centrifugation. The cells were then re-suspended and disrupted by sonication in 50 mM Hepes buffer, pH 8.0 and 100 µg/mL of the protease inhibitor phenylmethanesulfonyl fluoride. Insoluble cell debris was removed by centrifugation, after which ~1% w/v protamine sulfate was used to precipitate the nucleic acids. The precipitate was removed by centrifugation and the protein fractionated with ammonium sulfate to 50% of saturation. The precipitated protein was isolated by centrifugation. The protein was then re-suspended in a minimal amount of 20 mM Hepes buffer, pH 8.0, and then passed through a 0.2 µm pore filter prior to loading onto a pre-equilibrated Amersham HiLoad 26/60 Superdex 200 prep grade gel filtration column. The pooled fractions containing enzyme were loaded onto an Amersham 6 mL Resource Q anion exchange column. The column was washed with several column volumes of the same buffer and the protein eluted with a linear gradient buffer containing 1 M NaCl. The appropriate fractions were pooled after analysis with SDS PAGE.

Protein concentrations were determined by absorbance at 280 nm using the sequence based extinction coefficients calculated at [www.scripps.edu/~cdputnam/protcalc.html](http://www.scripps.edu/~cdputnam/protcalc.html). The purified protein migrated as a single band on SDS-PAGE. Amino acid analysis of the first five residues of the enzyme matched those expected from the DNA sequence of the target gene for Pa0142. The protein contained an average of 0.25 and 0.05 equivalents of  $\text{Zn}^{2+}$  and  $\text{Fe}^{2+}$ , respectively, per subunit. Pa0134 and b2883 were purified using the same protocol as the purification of Pa0142.

*Crystallization and Data Collection.* The crystals of the SeMet Pa0142 homologue complexed with  $\text{Zn}^{2+}$  were grown by vapor diffusion at room temperature. The following crystallization conditions were used: the protein solution contained the selenomethionine – substituted Pa0142 homologue (6.2 mg/mL) in 10 mM HEPES, pH 7.5, 150 mM NaCl, 10 mM methionine, and 10% glycerol; the precipitant contained 2.8 M sodium acetate, and 0.05 mM  $\text{ZnCl}_2$ . Crystals appeared in 6 days and exhibited diffraction consistent with the space group  $\text{P3}_221$ , with two molecules of the protein per asymmetric unit.

Prior to data collection, the crystals were transferred to cryoprotectant solutions composed of their mother liquors and 20% glycerol. After incubation for ~15 s, the crystals were flash-cooled in a nitrogen stream. A single-wavelength anomalous dispersion (SAD) data set for a crystal of the SeMet Pa0142 homologue with Zn was collected to 2.2 Å resolution at the NSLS X4A beamline (Brookhaven National Laboratory) on an ADSC CCD detector. Intensities were integrated and scaled with DENZO and SCALEPACK (1). Data collection statistics are given in **Table S1**.

*Structure Determination and Refinement.* The structure of the SeMet-substituted Pa0142 homologue complexed with  $\text{Zn}^{2+}$  was determined by SAD with PHENIX (2). Iterative cycles of automatic model rebuilding with PHENIX, ARP (3), manual rebuilding with TOM (4), and refinement with CNS (5) were performed. The model was refined at 2.2 Å with an  $R_{\text{cryst}}$  of 0.232 and an  $R_{\text{free}}$  of

0.276. The final structure (PDB ID 3HPA) contained two protein molecules, 129 water molecules and two well-defined Zn<sup>2+</sup> ions. Final crystallographic refinement statistics are provided in **Table S1**.

*Docking calculations.* Calculations were performed with DOCK3.5.54 (6-9). The pose of the substrate was calculated based on the docking spheres. These are anchor points for the heavy atoms of the substrate and are generated so that they will fill the protein binding site (6). Spheres are usually derived off of the atom positions of a ligand in the binding site. Since there is no such ligand present in the original structure, default settings for the sphere generation were used and modified manually to achieve more homogenous coverage. After matching each molecule on all possible sphere quartets, each pose is subjected to 25 steps of minimization with the simplex method. The binding affinity is estimated by adding the electrostatic and van der Waals interaction energies and correcting for the desolvation penalty incurred when the ligand is transferred from water into the low-dielectric environment of the protein (10). For efficiency reasons, these energy terms are precalculated and stored on grids.

*High-energy intermediates.* Docking of potential substrates can benefit from the representation of the molecules in their transition state (or high-energy intermediate [HEI]) geometry (11-14). In the case of the reactions catalyzed by the amidohydrolase superfamily, this is the tetrahedral state immediately after the attack of the catalytic water. For every potential substrate, all enantiomers of the tetrahedral intermediate as well as all protonation states of the leaving group are generated, resulting in four HEI variants for every reactable group.

## REFERENCES

1. Otwinowski, Z., and Minor, W. (1997) Processing of X-ray diffraction data collected in oscillation mode, in *Methods in Enzymology* (Carter, C. W. J., Sweet, R. M., Abelson, J. N., and Simon, M. I., Eds.) pp 307-326, Academic Pres, New York.
2. Adams, P.D., Grosse-Kunstleve, R.W., Hung, L.W., Ioerger, T.R., McCoy, A.J., Moriarty, N.W., Read, R.J., Sacchettini, J.C., Sauter, N.K., Terwilliger, T.C. (2002) PHENIX: building new software for automated crystallographic structure determination. *Acta Crystallogr., Sect. D: Biol. Crystallogr.* 58, 1948-1954.
3. Perrakis A., Morris, R, and Lamzin, V. S. (1999) Automated protein model building combined with iterative structure refinement. *Nature Struct. Biol.* 6, 458-463.
4. Jones, A. T. (1985) Interactive computer graphics: FRODO. *Methods Enzymol.* 115, 157-171.
5. Brunger, A. T., Adams, P. D., Clore, G. M., DeLano, W. L., Gros, P., Grosse-Kunstleve, R. W., Jiang, J. S., Kuszewski, J., Nilges, M., Pannu, N. S., Read, R. J., Rice, L. M., Simonson, T., and Warren, G. L. (1998) Crystallography & NMR system: A new software suite for macromolecular structure determination. *Acta Crystallogr., Sect. D: Biol. Crystallogr.* 54, 905-921.
6. Kuntz I. D, et al. (1982) A geometric approach to macromolecule-ligand interactions. *J. Mol. Biol.* 161:269-288.
7. Meng E. C, Shoichet B. K, Kuntz I. D (1992) Automated docking with grid-based energy evaluation. *J. Comput. Chem.* 13:505-524.
8. Shoichet B. K, Kuntz I. D (1993) Matching chemistry and shape in molecular docking. *Protein Eng.* 6:723-732.
9. Shoichet B. K, Leach A. R, Kuntz I. D (1999) Ligand solvation in molecular docking. *Proteins* 34:4-16.

10. Lorber D. M, Shoichet B. K (2005) Hierarchical docking of databases of multiple ligand conformations. *Curr. Top. Med. Chem.* 5:739-749.
11. Hermann JC, et al. (2006) Predicting substrates by docking high-energy intermediates to enzyme structures. *J. Am. Chem. Soc.* 128:15882-15891.
12. Hermann J. C, et al. (2007) Structure-based activity prediction for an enzyme of unknown function. *Nature* 448:775-U772.
13. Nowlan C., et al. (2006) Resolution of chiral phosphate, phosphonate, and phosphinate esters by an enantioselective enzyme library. *J. Am. Chem. Soc.* 128:15892-15902.
14. Xiang D. F, et al. (2009) Functional Annotation and Three-Dimensional Structure of Dr0930 from *Deinococcus radiodurans*, a Close Relative of Phosphotriesterase in the Amidohydrolase Superfamily. *Biochemistry* 48:2237-2247.

**Table S1:** Data Collection and Refinement Statistics

|                                 | SeMet Pa0142 homolog |
|---------------------------------|----------------------|
| <b><i>Data collection</i></b>   |                      |
| Beamline                        | NLSL X4A             |
| wavelength (Å)                  | 0.97915              |
| space group                     | P3 <sub>2</sub> 21   |
| # of molecules in a.u.          | 2                    |
| <b>Unit cell parameters</b>     |                      |
| a (Å)                           | 83.30                |
| c (Å)                           | 229.12               |
| resolution (Å) <sup>a</sup>     | 25-2.2 (2.28-2.2)    |
| unique reflections <sup>a</sup> | 47567 (4288)         |
| completeness (%) <sup>a</sup>   | 99.7 ( 97.0)         |
| R <sub>merge</sub> <sup>a</sup> | 0.079 (0.246)        |
| Average I/σ <sup>a</sup>        | 22.5 (4.1)           |
| <b><i>Refinement</i></b>        |                      |
| resolution                      | 25.0-2.2             |
| R <sub>cryst</sub>              | 0.232                |
| R <sub>free</sub>               | 0.276                |
| rmsd for bonds (Å)              | 0.006                |
| rmsd for angles (°)             | 1.3                  |
| # of protein atoms              | 6494                 |
| # of waters                     | 129                  |
| # of ions                       | 2 Zn <sup>2+</sup>   |
| PDB entry                       | 3HPA                 |

<sup>a</sup> Numbers in parentheses indicate values for the highest resolution shell.

**Table S2:** List of proteins predicted to possess 8-oxoguanine deaminase activity.

|    | Locus tag            | GI        | Organism                                                  |
|----|----------------------|-----------|-----------------------------------------------------------|
| 1  | PA0142               | 879447    | <i>Pseudomonas aeruginosa</i> PA01                        |
| 2  | PaerPA_01000142      | 107099133 | <i>Pseudomonas aeruginosa</i> PACS2                       |
| 3  | PA2G_04056           | 6715071   | <i>Pseudomonas aeruginosa</i> 2192                        |
| 4  | PACG_03701           | 6720155   | <i>Pseudomonas aeruginosa</i> C3719                       |
| 5  | PA14_01750           | 4383541   | <i>Pseudomonas aeruginosa</i> UCBPP-PA14                  |
| 6  | PSPA7_0219           | 5356948   | <i>Pseudomonas aeruginosa</i> PA7                         |
| 7  | Pmen_3705            | 5105700   | <i>Pseudomonas mendocina</i> ymp                          |
| 8  | PSEEN0675            | 4088425   | <i>Pseudomonas entomophila</i> L48                        |
| 9  | Pf101_0675           | 3713960   | <i>Pseudomonas fluorescens</i> PfO-1                      |
| 10 | PFL_0724             | 3481313   | <i>Pseudomonas fluorescens</i> Pf-5                       |
| 11 | PFLU0669             | 7819150   | <i>Pseudomonas fluorescens</i> SBW25                      |
| 12 | PSPTOT1_3659         | 213969358 | <i>Pseudomonas syringae</i> pv. tomato T1                 |
| 13 | atzB                 | 1182385   | <i>Pseudomonas syringae</i> pv. tomato str. DC3000        |
| 14 | Psyr_0669            | 3366147   | <i>Pseudomonas syringae</i> pv. <i>Syringae</i> B728a     |
| 15 | Psyrpo1_010100001930 | 237797581 | <i>Pseudomonas syringae</i> pv. <i>oryzae</i> str. 1_6    |
| 16 | PSPPH_4628           | 3555934   | <i>Pseudomonas syringae</i> pv. <i>phaseolicola</i> 1448A |
| 17 | atzB                 | 5096040   | <i>Pseudomonas stutzeri</i> A1501                         |
| 18 | Arth_3425            | 4444155   | <i>Arthrobacter</i> sp. FB24                              |

|    |               |           |                                              |
|----|---------------|-----------|----------------------------------------------|
| 19 | AAur_3399     | 4639368   | <i>Arthrobacter aurescens</i> TC1            |
| 20 | Achl_3205     | 7294686   | <i>Arthrobacter chloophenolicus</i> A6       |
| 21 | ACIAD0761     | 2879221   | <i>Acinetobacter sp.</i> ADP1                |
| 22 | BlinB01003114 | 62423337  | <i>Brevibacterium linens</i> BL2             |
| 23 | VSAK1_24940   | 149188732 | <i>Vibrio shilonii</i> AK1                   |
| 24 | V12B01_19391  | 84386830  | <i>Vibrio splendid</i> 12B01                 |
| 25 | VSWAT3_19088  | 148978109 | <i>Vibrionales bacterium</i> SWAT-3          |
| 26 | P3TCK_01255   | 90413684  | <i>Photobacterium profundum</i> 3TCK         |
| 27 | PBPRA2267     | 3122820   | <i>Photobacterium profundum</i> SS9          |
| 28 | KT99_04812    | 163751045 | <i>Shewanella benthica</i> KT99              |
| 29 | PE36_19015    | 149908977 | <i>Moritella sp.</i> PE36                    |
| 30 | SI859A1_03023 | 90420336  | <i>Aurantimonas manganoxydans</i> SI85-9A1   |
| 31 | Pcryo_1786    | 4033973   | <i>Psychrobacter cryohalolentis</i> K5       |
| 32 | Mnod_1111     | 7304423   | <i>Methylobacterium nodulans</i> ORS 2060    |
| 33 | MELB17_16823  | 126666105 | <i>Marinobacter sp.</i> ELB17                |
| 34 | Mext_1697     | 5832952   | <i>Methylobacterium extorquens</i> PA1       |
| 35 | Mchl_2016     | 7118716   | <i>Methylobacterium chloromethanicum</i> CM4 |
| 36 | BRADO1738     | 5118449   | <i>Bradyrhizobium sp.</i> ORS278             |
| 37 | Mchl_3248     | 7117587   | <i>Methylobacterium chloromethanicum</i> CM4 |
| 38 | Mpop_1121     | 6313798   | <i>Methylobacterium populi</i> BJ001         |
| 39 | M446_2144     | 6130066   | <i>Methylobacterium sp.</i> 4-46             |
| 40 | FP2506_15334  | 114705851 | <i>Fulvimarina pelagi</i> HTCC2506           |
| 41 | B116159       | 1048904   | <i>Bradyrhizobium japonicum</i> USDA 110     |



|     |                     |           |                                                |
|-----|---------------------|-----------|------------------------------------------------|
| 42  | MED121_14459        | 87118237  | <i>Marinomonas sp.</i> MED121                  |
| 43  | MDG893_15717        | 149375925 | <i>Marinobacter algicola</i> DG893             |
| 44  | BBta 2050           | 5153053   | <i>Brandyrhizobium sp.</i> BTAi1               |
| 45  | Mrad2831_4071       | 6140129   | <i>Methylobacterium radiotolerans</i> JCM 2831 |
| 46  | HCH_01106           | 3841406   | <i>Hahella chejuensis</i> KCTC 2396            |
| 47  | Mext_3024           | 5835455   | <i>Methylobacterium extorquens</i> PA1         |
| 48  | CJA_0540            | 6415371   | <i>Cellvibrio japonicus</i> Uedal07            |
| 49  | Patl_2224           | 4172376   | <i>Pseudoalteromonas atlantica</i> T6c         |
| 50  | StermDRAFT_06890    | 229881741 | <i>Sebaldella termitidis</i> ATCC 33386        |
| 51  | Francci3_0845       | 3904327   | <i>Frankia sp.</i> Cc13                        |
| 52  | Bphy_1293           | 6242785   | <i>Burkholderia phymatum</i> STM815            |
| 53  | Bxe_A1936           | 4003154   | <i>Burkholderia xenovorans</i> LB400           |
| 54  | Bphyt_2323          | 6281242   | <i>Burkholderia phytofirmans</i> PsJN          |
| 55  | BgramDRAFT_5200     | 170695243 | <i>Burkholderia graminis</i> C4D1M             |
| 56  | SADFL11_1395        | 7514273   | <i>Labrenzia alexandrii</i> DFL-11             |
| 57  | NOR53_2032          | 7635455   | <i>Gamma proteobacterium</i> NOR5-3            |
| 58  | Bcep18194_A5267     | 3750479   | <i>Burkholderia sp.</i> 383                    |
| 59  | BuboB_010100016293  | 167586903 | <i>Burkholderia ubonensis</i> Bu               |
| 60  | BTH_I2073           | 3848116   | <i>Burkholderia thailandensis</i> E264         |
| 61* | NYSGXRC-9236e       | 44264246  | Env. Samp. of Sargasso sea                     |
| 62  | BDAG_01340          | 6703425   | <i>Burkholderia dolosa</i> AUO158              |
| 63  | BthaT_010100025531  | 167581531 | <i>Burkholderia thailandensis</i> TXDOH        |
| 64  | Bpse38_010100010869 | 167836982 | <i>Burkholderia thailandensis</i> MSMB43       |

|    |                      |           |                                             |
|----|----------------------|-----------|---------------------------------------------|
| 65 | BH160DRAFT_3765      | 209518669 | <i>Burkholderia</i> sp. H160                |
| 66 | BCPG_02756           | 6709226   | <i>Burkholderia cenocepacia</i> PC184       |
| 67 | BCAL2029             | 6932197   | <i>Burkholderia cenocepacia</i> J2315       |
| 68 | Bcenmc03 1980        | 6123644   | <i>Burkholderia cenocepacia</i> MC0-3       |
| 69 | Bglu_1g13210         | 7908425   | <i>Burkholderia glumae</i> BGR1             |
| 70 | KoleDRAFT_1086       | 213014337 | <i>Thermotogales bacterium</i> TBF 19.5.1   |
| 71 | Bcen_6122            | 4097155   | <i>Burkholderia cenocepacia</i> AU 1054     |
| 72 | KT71_15846           | 88703340  | <i>Congregibacter litoralis</i> KT71        |
| 73 | atzB                 | 3688614   | <i>Burkholderia pseudomallei</i> 1710b      |
| 74 | Bpse112_010100013174 | 167911441 | <i>Burkholderia pseudomallei</i> 112        |
| 75 | GBP346_A2491         | 7888169   | <i>Burkholderia pseudomallei</i> MSHR346    |
| 76 | Bpse17_030300030822  | 161374040 | <i>Burkholderia pseudomallei</i> 1710a      |
| 78 | BPSL2112             | 3092957   | <i>Burkholderia pseudomallei</i> K96243     |
| 79 | BURPS1106A_2422      | 4901051   | <i>Burkholderia pseudomallei</i> 1106a      |
| 80 | PputW619_3055        | 6112005   | <i>Pseudomonas putida</i> W619              |
| 81 | Bpse7_010100013763   | 167894812 | <i>Burkholderia pseudomallei</i> 7894       |
| 82 | BpseN_010100013161   | 167903203 | <i>Burkholderia pseudomallei</i> NCTC 13177 |
| 83 | Bamb_1943            | 4310181   | <i>Burkholderia ambifaria</i> AMMD          |
| 84 | Bpse110_020300007234 | 161355267 | <i>Burkholderia pseudomallei</i> 1106b      |
| 85 | pC2C203U28_p100      | 7636495   | <i>Clostridium botulinum</i>                |
| 86 | BamIOP4010DRAFT_5246 | 170702284 | <i>Burkholderia ambifaria</i> IOP40-10      |
| 87 | BamMEX5DRAFT_6744    | 171322619 | <i>Burkholderia ambifaria</i> MEX-5         |
| 88 | CSBG_01722           | 7864561   | <i>Clostridium</i> sp. 7_2_43FAA            |

|     |                    |           |                                                 |
|-----|--------------------|-----------|-------------------------------------------------|
| 89  | BamMC406_1870      | 6178204   | <i>Burkholderia ambifaria</i> MC40-6            |
| 90  | BURMUCGD1_1300     | 221215518 | <i>Burkholderia multivorans</i> CGD1            |
| 91  | Bcep1808_1882      | 4953605   | <i>Burkholderia vietnamiensis</i> G4            |
| 92  | PputGB1_3262       | 5871047   | <i>Pseudomonas putida</i> GB-1                  |
| 93  | PP_2584            | 1045965   | <i>Pseudomonas putida</i> KT2440                |
| 94  | NT01EI_2443        | 7959175   | <i>Edwardsiella ictaluri</i> 93-146             |
| 95  | Pput_3132          | 5195102   | <i>Pseudomonas putida</i> F1                    |
| 96  | Daci_1591          | 5747148   | <i>Delftia acidovorans</i> SPH-1                |
| 97  | PB2503_11584       | 84704671  | <i>Parvularcula bermudensis</i> HTCC2503        |
| 98  | BURMUCGD2M_1761    | 221198260 | <i>Burkholderia multivorans</i> CGD2M           |
| 99  | Noca_1626          | 4600005   | <i>Nocardioides</i> sp. JS614                   |
| 100 | Bmul_1313          | 5764920   | <i>Burkholderia multivorans</i> ATCC 17616      |
| 101 | mma_0509           | 5352721   | <i>Janthinobacterium</i> Sp. Marseille          |
| 102 | Mpop_1247          | 6313306   | <i>Methylobacterium populi</i> BJ001            |
| 103 | CLL_A0628          | 6293100   | <i>Clostridium botulinum</i> B str. Eklund 17B  |
| 104 | Mchl_2080          | 7115864   | <i>Methylobacterium chloromethanicum</i> CM4    |
| 105 | BoklC_010100010767 | 167570319 | <i>Burkholderia oklahomensis</i> C6786          |
| 106 | Pden_3916          | 4582467   | <i>Paracoccus denitrificans</i> PD1222          |
| 107 | Xaut_2741          | 5424708   | <i>Xanthobactor autotrophicus</i> Py2           |
| 108 | CLH_0589           | 6317741   | <i>Clostridium botulinum</i> E3 str. Alaska E43 |
| 109 | Rxyl_2838          | 4117689   | <i>Rubrobacter xylanophilus</i> DSM 9941        |
| 110 | Franean1_5674      | 5674001   | <i>Frankia</i> sp. EAN1pec                      |
| 111 | Mrad2831_6206      | 6142345   | <i>Methylobacterium radiotolerans</i> JCM2831   |

|     |                    |           |                                            |
|-----|--------------------|-----------|--------------------------------------------|
| 112 | BACCAP_04381       | 154500708 | <i>Bacteroides capillosus</i> ATCC 29799   |
| 113 | Tmel_1728          | 5296651   | <i>Thermosipho melanesiensis</i> BI429     |
| 114 | Cbei_2067          | 5293279   | <i>Clostridium beijerinckii</i> NCIMB 8052 |
| 115 | FRAAL1474          | 4235777   | <i>Frankia alni</i> ACN14a                 |
| 116 | h16_A1363          | 4249475   | <i>Ralstonia eutropha</i> H16              |
| 117 | Pmob_1736          | 5757974   | <i>Petrotoga mobilis</i> SJ95              |
| 118 | RALTA_A1283        | 6453012   | <i>Cupriavidus taiwanensis</i>             |
| 119 | RCCS2_14544        | 126735104 | <i>Roseobacter</i> sp. CCS2                |
| 120 | Mpe_A0782          | 4784170   | <i>Methylibium petroleiphilum</i> PM1      |
| 121 | CtesDRAFT_PD0564   | 221065227 | <i>Comamonas testosteroni</i> KF-1         |
| 122 | Lcho_1140          | 6163813   | <i>Leptothrix cholodnii</i> SP-6           |
| 123 | RB2150_16594       | 126727973 | <i>Rhodobacterales bacterium</i> HTCC2150  |
| 124 | Cbac1_010100016929 | 224388129 | <i>Clostridiales bacterium</i> 1_7_47_FAA  |
| 125 | R2601_20986        | 114762995 | <i>Roseovarius</i> sp. HTCC2601            |
| 126 | THA_25             | 7070815   | <i>Thermosipho africanus</i> TCF52B        |
| 127 | S7335_3628         | 7570418   | <i>Synechococcus</i> sp. PCC 7335          |
| 128 | HneapDRAFT_0499    | 225303291 | <i>Halothiobacillus neapolitanus</i> c2    |
| 129 | VDG1235_1698       | 7583649   | <i>Verrucomicrobiae bacterium</i> DG1235   |
| 130 | ANACOL_00024       | 167768708 | <i>Anaerotruncus colihominis</i> DSM 17241 |
| 131 | CLOSTASPAR_03878   | 225390128 | <i>Clostridium asparagiforme</i> DSM 15981 |
| 132 | CLOBOL_06600       | 160941704 | <i>Clostridium bolteae</i> ATCC BAA-613    |
| 133 | Reut_A1294         | 3611928   | <i>Ralstonia eutropha</i> JMP134           |
| 134 | Rpic_2259          | 6289356   | <i>Ralstonia pickettii</i> 12J             |

|     |                    |           |                                              |
|-----|--------------------|-----------|----------------------------------------------|
| 135 | VspiD_010100021095 | 171913717 | <i>Verrucomicrobi spinosum</i> DSM 4136      |
| 136 | OIH45_10143        | 163745939 | <i>Oceanibulbus indolifex</i> HEL-45         |
| 137 | MAB_2927c          | 5965434   | <i>Mycobacterium abscessus</i>               |
| 138 | Rpic12DDRAFT_0675  | 153888567 | <i>Ralstonia picketti</i> 12D                |
| 139 | Jann_1234          | 3933679   | <i>Jannaschia sp.</i> CCS1                   |
| 140 | GobsDRAFT_06540    | 227405252 | <i>Geodermatophilus obscurus</i> DSM 43160   |
| 141 | atzB               | 7593298   | <i>Roseobacter sp.</i> GAI101                |
| 142 | SIAM614_20905      | 118591899 | <i>Stappia aggregata</i> IAM 12614           |
| 143 | TM1040_1906        | 4077403   | <i>Silicibacter sp.</i> TM1040               |
| 144 | BHWA1_02619        | 7667707   | <i>Brachyspira hyodysenteriae</i> WA1        |
| 145 | RB2654_08457       | 84686221  | <i>Rhodobacterales bacterium</i> HTCC2654    |
| 146 | BmurDRAFT_00390    | 227999304 | <i>Brachyspira murdochii</i> DSM 12563       |
| 147 | RR11_659           | 7624076   | <i>Ruegeria sp.</i> R11                      |
| 148 | MSMEG_1297         | 4531257   | <i>Mycobacterium smegmatis str.</i> MC2 155  |
| 149 | OG2516_00245       | 89069700  | <i>Oceanicola granulosus</i> HTCC2516        |
| 150 | RRSL_01271         | 83748887  | <i>Ralstonia solanacearum</i> UW551          |
| 151 | RSMK01192          | 6954169   | <i>Ralstonia solanacearum</i> Molk2          |
| 152 | RB2083_1302        | 7579673   | <i>Rhodobacterales bacterium</i> HTCC2083    |
| 153 | SSCG_02005         | 6838461   | <i>Streptomyces clavuligerus</i>             |
| 154 | Magn03006515       | 46203056  | <i>Magnetospirillum magnetotacticum</i> MS-1 |
| 155 | RSK20926_22599     | 126739238 | <i>Roseobacter sp.</i> SK209-2-6             |
| 156 | RKLH11_2317        | 7627427   | <i>Rhodobacteraceae bacterium</i> KLH11      |
| 157 | atzB               | 4941115   | <i>Saccharopolyspora erythraea</i> NRRL 2338 |

|     |                    |           |                                                              |
|-----|--------------------|-----------|--------------------------------------------------------------|
| 158 | Dshi_2773          | 5713672   | <i>Dinoroseobacter shibae</i> DFL 12                         |
| 159 | SnasDRAFT_44920    | 229865225 | <i>Stackebrandtia nassauensis</i> DSM 44728                  |
| 160 | Bpse9_010100014316 | 167816318 | <i>Burkholderia pseudomallei</i> 91                          |
| 161 | Gdia_3513          | 6976965   | <i>Gluconacetobacter diazotrophicus</i> PA1 5                |
| 162 | guaD               | 5789984   | <i>Gluconacetobacter diazotrophicus</i> PA1 5                |
| 163 | RGBS107_18053      | 163737460 | <i>Phaeobacter gallaeciensis</i> BS107                       |
| 164 | OA238_3529         | 7523411   | <i>Octadecabacter antarcticus</i> 238                        |
| 165 | RG210_13486        | 163740856 | <i>Phaeobacter gallaeciensis</i> 2.10                        |
| 166 | RHOER0001_4250     | 229489548 | <i>Rhodococcus erythropolis</i> SK121                        |
| 167 | EE36_11673         | 83944527  | <i>Sulfitobacter</i> sp. EE-36                               |
| 168 | OA307_342          | 7603653   | <i>Octadecabacter antarcticus</i> 307                        |
| 169 | SPO2957            | 3194390   | <i>Silicibacter pomeroyi</i> DSS-3                           |
| 170 | RER_21130          | 7714318   | <i>Rhodococcus erythropolis</i> PR4                          |
| 171 | atzB               | 1220960   | <i>Ralstonia solanacearum</i> GMI1000                        |
| 172 | CaciDRAFT_38210    | 229248212 | <i>Catenulispora acidiphila</i> DSM 44928                    |
| 173 | MED193_21601       | 86140035  | <i>Roseobacter</i> sp. MED193                                |
| 174 | NAS141_16899       | 83955348  | <i>Sulfitobacter</i> sp. NAS-14.1                            |
| 175 | SGR_1307           | 6209440   | <i>Streptomyces griseus</i> subsp. <i>Griseus</i> NBRC 13350 |
| 176 | atzB               | 4222059   | <i>Rhodococcus</i> sp. RHA1                                  |
| 177 | atzB               | 4196714   | <i>Roseobacter denitrificans</i> OCh 114                     |
| 178 | RLO149_17318       | 163733433 | <i>Roseobacter litoralis</i> Och 149                         |
| 179 | NamuDRAFT_10270    | 229222217 | <i>Nakamurella multipartita</i> DSM 44233                    |

|     |                     |           |                                                                          |
|-----|---------------------|-----------|--------------------------------------------------------------------------|
| 180 | Rmet_1186           | 4037987   | <i>Ralstonia metallidurans</i> CH34                                      |
| 181 | ROP_44280           | 7742160   | <i>Rhodococcus opacus</i> B4                                             |
| 182 | SSDG_03874          | 6842290   | <i>Streptomyces pristinaespiralis</i> ATCC 25486                         |
| 183 | SCO6213             | 1101654   | <i>Streptomyces coelicolor</i> A3 (2)                                    |
| 184 | SAV_2017            | 1213459   | <i>Streptomyces avermitilis</i> MA-4680                                  |
| 185 | GbroDRAFT_06290     | 227400018 | <i>Gordonia bronchialis</i> DSM 43247                                    |
| 186 | SSEG_02091          | 6852719   | <i>Streptomyces sviveus</i> ATCC 29083                                   |
| 187 | Bpse14_010100013624 | 167739105 | <i>Burkholderia pseudomallei</i> 14                                      |
| 188 | RB4I_2538           | 7619385   | <i>Rhodobacterales bacterium</i> Y4I                                     |
| 189 | SSBG_04646          | 6861992   | <i>Streptomyces</i> sp. SPB74                                            |
| 190 | OB2597_10014        | 84500269  | <i>Oceanicola batsensis</i> HTCC2597                                     |
| 191 | SrosDRAFT_80950     | 229857618 | <i>Streptosporangium roseum</i> DSM 43021                                |
| 192 | Nfa52410            | 3110729   | <i>Nocardia farcinica</i> IFM 10152                                      |
| 193 | SSAG_01926          | 6859830   | <i>Streptomyces</i> sp. Mg1                                              |
| 194 | OM2255_10461        | 114769985 | <i>Rhodobacterales bacterium</i> HTCC2255                                |
| 195 | MCAG_05318          | 238064352 | <i>Micromonospora</i> sp. ATCC 39149                                     |
| 196 | MMAR_2844           | 6227111   | <i>Mycobacterium marinum</i> M                                           |
| 197 | NdasDRAFT_4742      | 229209177 | <i>Nocardiopsis dassonvillei</i> subsp. <i>dassonvillei</i><br>DSM 43111 |
| 198 | MUL_2914            | 4553343   | <i>Mycobacterium ulcerans</i> Agy99                                      |
| 199 |                     |           |                                                                          |
| 200 | Krad_4281           | 5335917   | <i>Kineococcus radiotolerans</i> SRA30216                                |
| 201 | BpseD_010100013846  | 167720093 | <i>Burkholderia pseudomallei</i> DM98                                    |
| 202 | Noca_0677           | 4599542   | <i>Nocardioides</i> sp. JS614                                            |

|     |                    |           |                                                            |
|-----|--------------------|-----------|------------------------------------------------------------|
| 203 | BokIE_010100011296 | 167563133 | <i>Burkholderia oklahomensis</i> EO147                     |
| 204 | R2601_07911        | 114767058 | <i>Roseovarius</i> sp. HTCC2601                            |
| 205 | RHE_PC00089        | 3895310   | <i>Rhizobium etli</i> CFN 42                               |
| 206 | pRL100336          | 116254776 | <i>Rhizobium leguminosarum</i> bv. <i>viciae</i> 3841      |
| 207 | HPDFL43_14672      | 163758676 | <i>Hoeflea phototrophica</i> DFL-43                        |
| 208 | smzB               | 111183223 | <i>Herbaspirillum</i> sp. B601                             |
| 209 | atzB               | 55416015  | <i>beta proteobacterium</i> CDB21                          |
| 210 | Rleg2_4464         | 6977558   | <i>Rhizobium leguminosarum</i> bv. <i>Trifolii</i> WSM2304 |
| 211 | Magn03006970       | 23012454  | <i>Magnetospirillum magnetotacticum</i> MS-1               |
| 212 | Cbac1_010100004932 | 224385745 | <i>Clostridiales bacterium</i> 1_7_47_FAA                  |
| 213 | CLOBOL_05339       | 160940449 | <i>Clostridium bolteae</i> ATCC BAA-613                    |
| 214 | trzN               | 156257442 | <i>Arthrobacter</i> sp. AD26                               |
| 215 | trzN               | 17432321  | <i>Nocardioides</i> sp. C190                               |
| 216 | AtzB               | 117583158 | <i>Arthrobacter</i> sp. AD25                               |
| 217 | AAur_pTC10087      | 119952514 | <i>Arthrobacter aurescens</i> TC1                          |
